# Supplementary material for: The Viral Infection and Respiratory Illness Universal Study (VIRUS): An International Registry of Coronavirus 2019-Related Critical Illness
Source: PubMed Central journal article supplement — Crit Care Explor. 2020 Apr 29;2(4):e0113. doi: 10.1097/CCE.0000000000000113 (PMC7188422; doi:10.1097/cce.0000000000000113), 2020-04-29
Supplement: cc9-2-e0113-s001.pdf [file cc9-2-e0113-s001.pdf]

# Core Data I (Inclusion, Testing, Trials, Location, Admin)

Hospital/ICU Identifier

---

Patient Study (ID) please don't write clinical number  
or any other identifier- instructions here -->

(Hospital/ICU Identifier-001, Hospital/ICU  
Identifier-002....)

## Inclusion-Exclusions-COVID19 Testing

Inclusion

- COVID-19 PCR (any other SARS-CoV-2) test positive  
(within 7 days)
- COVID-19 PCR (any other SARS-CoV-2) test pending
- COVID-19 high clinical suspicion  
(If yes for any, go ahead and check for  
exclusions)

Exclusions

- Patient without Prior Research Authorization (only  
applicable to Mayo Clinic sites)
- Non COVID-19 related admissions
- Already Included in VIRUS- COVID19 Registry
- None  
(If you click anything other than None, stop here  
and move on to enroll another patient)

Is COVID testing performed prior to admission?

- Yes  
 No

How many days prior to admission was COVID testing  
performed?

---

Which hospital day was first COVID test performed?

---

(1 or 2 or 3 or 4...)

Was COVID testing done on multiple days?

- Yes  
 No

Total number of COVID tests sent?

- 1  
 2  
 3  
 4+

Total number of COVID tests before positive result?

- 1  
 2  
 3  
 4+  
 All negative

How many days prior to hospitalization COVID-19  
symptoms started?

---

(1 or 2 or 3 or 4...)

---

Site of COVID-19 Test

- Nasopharyngeal Swab  
 Sputum/Tracheal Aspirate  
 BAL- Bronchoalveolar Lavage  
 Others

---

Test\_Other

---

---

### Other COVID19 Clinical Trials

---

Is Patient Participating in Another Clinical Trial or Prospective Study Related to COVID-19

- yes  
 No

---

If yes , Please specify Clinical Trial or Prospective Study name or Novel Drug Therapy or Trial/NCT ID

---

---

### Location

---

Country

- United States  
 Argentina  
 Belgium  
 Bolivia  
 Bosnia and Herzegovina  
 Canada  
 China  
 Croatia  
 Dominican Republic  
 France  
 Germany  
 Greece  
 India  
 Iran  
 Italy  
 Japan  
 Lebanon  
 Libya  
 Mexico  
 Pakistan  
 Peru  
 Philippines  
 Saudi Arabia  
 Serbia  
 South Korea  
 Spain  
 Spain  
 Turkey  
 UAE  
 Uganda  
 Other  
(If other, fill contry name in box below)

---

Country\_Other

---

**Administrative Data**

Patient Employed as a Healthcare Worker or in a Microbiology Laboratory?

- Yes  
 No

Healthcare Worker- Category

- Staff Doctor/Consultant/Attending  
 Trainee Doctor- Resident/Fellow/Medical Student  
 Nurse  
 Respiratory Therapist  
 Pharmacist  
 Support Staff  
 EMS personnel  
 Research Staff  
 Nurse Aid/ Midwife  
 Nursing Home Staff  
 Other

Health Care Worker\_Other

\_\_\_\_\_

Hospital Admission Source

- Home  
 Nursing Home  
 Hospital ED  
 Outside ED  
 Transfer from other Facility  
 Other

If other, please explain

\_\_\_\_\_

Days of Stay at Prior Transferring Facility

\_\_\_\_\_

Admitted to ICU

- Yes  
 No

Which Hospital Day Patient Got admitted to ICU

\_\_\_\_\_ (1 or 2 or 3 or 4...)

ICU admission source

- Nursing Home  
 Hospital ED  
 Outside ED  
 Floor  
 Operating room  
 Other  
 (If other, fill the next box)

If other, please explain

\_\_\_\_\_

# Core Data II (Demographics, Symptoms, Premeds, History, Diagnosis)

## Demographics

Age (if more than 90, just write >90 - (do not write exact age in this case)

\_\_\_\_\_  
(xx)

For Paediatric Patient, Age in Months (if less than 5 years)

\_\_\_\_\_

Sex

- Male  
 Female  
 Intersex  
 Transgender

Is Patient Pregnant?

- Yes  
 No  
 Unknown

Gestational Age at Hospital Admission (in weeks)

\_\_\_\_\_

Weight (kg) at Hospital Admission

\_\_\_\_\_  
(xxx)

Height (cm)

\_\_\_\_\_  
(xxx)

Race

- American Indian or Alaska Native  
 Asian  
 Black or African American  
 Native Hawaiian or Other Pacific Islander  
 White Caucasian  
 Other

Other-Race

\_\_\_\_\_

Ethnic group

- Hispanic  
 Non Hispanic  
 Not Applicable

**COVID-19 Signs and Symptom**

Signs And Symptoms At Hospital Admission (Check all that apply)

- Abdominal Pain
- Ageusia- Loss of Taste sense
- Anorexia- Loss of Appetite
- Anosmia- Loss of Smell sense
- Arthralgia
- Chest Pain/Tightness
- Chills/Rigors
- Confusion/Delirium
- Conjunctival Congestion
- Cough - Dry
- Cough - with Sputum
- Diarrhea
- Dizziness/Lightheadedness
- Dyspnea/Shortness of Breath
- Fever
- Headache
- Hemoptysis
- Malaise
- Myalgia Or Fatigue
- Nasal Congestion/Rhinorrhea
- Nausea/Vomiting
- Night Sweat
- Seizure
- Sneezing
- Sore Throat/Throat Pain
- Other ( Please List All)

Signs-Symptoms\_Others

---

**Contact/Travel History**

Did patient Have Any Recent Travel History (before onset of illness) ?

- Yes
- No
- Unknown

---

Did patient have any of the following?

- A history of travel to an area with documented cases of SARS-CoV-2 infection
  - Close contact with a confirmed or probable case of SARS-CoV-2 infection, while that patient was symptomatic
  - Presence in a healthcare facility where SARS-CoV-2 infections have been managed
  - Presence in a laboratory handling suspected or confirmed SARS-CoV-2 samples
  - Direct contact with animals in countries where the SARS-CoV-2 is known to be circulating in animal populations or where human infections have occurred as a result of presumed zoonotic transmission
  - Seafood Wholesale Market
  - Contact With Another Person With Respiratory Symptoms
  - No Exposure To Either Market Or Person With Respiratory Symptoms
  - History of Travel to Affected Regions/Countries
  - History of travel on Cruise
  - Contact With Wildlife
  - Other ( Please specify)  
(Past 14-30 days (before onset of illness))
- 

Travel\_others

---

**Comorbidites**

---

---

Comorbidities (Click all that apply)

- None
- Coronary artery disease
- Hypertension
- Cardiac arrhythmias
- Congestive heart failure
- Valvular heart disease
- Chronic pulmonary disease (not asthma)
- Asthma (physician diagnosed)
- Pulmonary circulation disorder
- Chronic Kidney Disease
- Chronic dialysis
- Diabetes (DM)
- Hypothyroidism
- Liver disease
- Hepatitis B
- Hepatitis C
- Peptic ulcer disease excluding bleeding
- Solid tumor without metastasis
- Hematologic malignancy
- Metastatic cancer
- History of solid organ or bone marrow transplant
- HIV/AIDS or other immunosuppression
- Stroke or other neurological disorders
- Paralysis
- Rheumatoid arthritis/collagen vascular disease
- Blood loss anemia
- Iron deficiency anemia
- Coagulopathy
- Tobacco abuse
- Alcohol use disorder
- Substance use disorder
- Depression
- Psychosis
- Dementia
- Obesity
- Malnutrition
- Other

---

Comorbidites\_Other

---

---

If Congestive heart failure (CHF)

- NYHA I
- NYHA II
- NYHA III
- NYHA IV

---

CKD Stages

- CKD 1
- CKD 2
- CKD 3
- CKD 4
- CKD 5 (Not on HD)
- ESRD (CKD 5 on HD)

**Pre-Hospital (Home) Medications**

Pre-Hospital (Home) Medication (check all that apply)

- ACE inhibitor
- Angiotensin receptor blocker
- Antiretroviral therapy
- Antibiotics
- Aspirin
- Chemotherapy currently or in the last 3 months
- Immunotherapy (i.e., CNI, mAb, thymoglobulin, anti-proliferatives)
- Inhaled corticosteroids
- NSAID/Ibuprofen
- Other anti hypertensive agent (eg., Beta blocker, calcium channel blocker, diuretic)
- Paracetamol/Acetaminophen
- Proton Pump inhibitors
- Statin
- Systemic Corticosteroid
- Anticoagulants
- Other ( Please specify)

Home Medications\_Others

Any Medication Allergy

(Write 'None' if no known meds allergies)

**Social and Vaccination History**

Social History

- Current Smoler
- Former Smoker
- Vaping
- Alcohol use disorder
- Substance use disorder
- None

Vaccinations?

- Pneumococcal
- Seasonal Flu
- Others

Other\_Vaccination

**COVID-19 Diagnosis and Complications**



Admission Diagnosis/Complications (check all that apply)

- Acute Hypoxic Respiratory Failure (non-ARDS)
- Acute Liver Injury
- Acute Myocardial Infarction
- Acute Renal Failure requiring Hemofiltration
- Acute Renal Injury, no Hemofiltration
- ARDS
- Bacteremia
- Bacterial pneumonia
- Cardiac arrest
- Cardiac arrhythmia: atrial fibrillation
- Cardiac arrhythmia: heart block
- Cardiac arrhythmia: torsades des point
- Cardiac arrhythmia: ventricular tachycardia
- Congestive heart failure / Cardiomyopathy
- Delirium / Encephalopathy
- Disseminated Intravascular Coagulation
- Gastrointestinal hemorrhage
- Hyperglycemia
- Hypoglycemia
- Meningitis/Encephalitis
- Myocarditis
- Pneumothorax
- Pleural effusion
- Rhabdomyolysis / Myositis
- Seizure
- Sepsis
- Shock
- Stroke
- Other ( Please List All)

Other- Admission Diagnosis

---

ARDS Type

(<https://www.medscape.com/answers/168402-27299/what-are-the-classifications-for-acute-respiratory-distress-syndrome-ard>)

- Mild (P:F 200-300)
- Moderate (P:F 100-199)
- Severe (P:F < 100)

Type of Shock

- Distributive Shock (Due To Infections)
- Hypovolemic Shock (Caused By Too Little Blood Volume)
- Anaphylactic Shock (Caused By Allergic Reaction)
- Cardiogenic Shock (Due To Heart Problems)
- Neurogenic Shock (Caused By Damage To The Nervous System)

ICU Support Measures Needed? (check all that apply)

- AirVo (high flow nasal cannula)
  - CRRT/HD
  - Inotropes
  - Mechanical ventilation
  - Non-invasive positive pressure ventilation
  - Vasopressors
  - Neuromuscular blocking agents
  - Prone ventilation
  - Inhaled nitric oxide or epoprostenol
  - Tracheostomy insertion
  - None
  - Other
- (only apply to the patients who are in make shift ICU)

If Other ICU care level (Please Write)

---

## Core Data III (Microbiology, Misc Tests)

### Microbiology Data

Was Pathogen Testing Done During This Illness Episode?

- Yes  
 No

Influenza/RSV PCR performed

- Yes  
 No

Which Hospital Day influenza/RSV PCR Was Done

\_\_\_\_\_  
(1 or 2 or 3 or 4...)

Influenza/RSV PCR Positive

- Yes Confirmed  
 Yes Probable  
 No

Influenza/RSV PCR Test Results

- Influenza A  
 Influenza B  
 RSV  
 None

Type of Influenza A

- A/H3N2  
 A/H1N1pdm09  
 A/H7N9  
 A/H5N1  
 A, not typed

Respiratory Viral Panel (RVP) Performed

- Yes  
 No

Which Hospital Day RVP PCR Was Done?

\_\_\_\_\_  
(1 or 2 or 3 or 4...)

RVP PCR Positive

- Yes Confirmed  
 Yes Probable  
 No

RVP Pathogens Detected

- Adenovirus B/E
- Adenovirus C
- Bordetella Holmesii
- Bordetella Parapertussis/B. Bronchiseptica
- Bordetella Pertussis
- Chlamydomphila Pneumoniae,
- Coronavirus 229E
- Coronavirus HKU1
- Coronavirus NL63
- Coronavirus OC43
- Human Metapneumovirus
- Human Rhinovirus/Enterovirus
- Influenza A H1
- Influenza A H3
- Influenza A Subtypes 2009H1N1
- Influenza A
- Influenza B
- Mycoplasma Pneumoniae
- Parainfluenza Virus Types 1
- Parainfluenza Virus Types 2
- Parainfluenza Virus Types 3
- Parainfluenza Virus Types 4
- Respiratory Syncytial Virus
- None

Biofire Respiratory Panel (BRP) Performed

- Yes
- No

Which Hospital Day BRP Was performed?

---

 (1 or 2 or 3 or 4...)

BRP positive?

- Yes Confirmed
- Yes Probable
- No

BRP- pathogens detected

- Adenovirus
- Bordetella parapertussis\*
- Bordetella pertussis
- Chlamydia pneumoniae
- Coronavirus 229E
- Coronavirus HKU1
- Coronavirus NL63
- Coronavirus OC43
- Human Metapneumovirus
- Human Rhinovirus/Enterovirus
- Influenza A
- Influenza A/H1
- Influenza A/H1-2009
- Influenza A/H3
- Influenza B
- Mycoplasma pneumoniae
- Parainfluenza Virus 1
- Parainfluenza Virus 2
- Parainfluenza Virus 3
- Parainfluenza Virus 4
- Respiratory Syncytial Virus (RSV)
- None

Biofire Pneumonia Panel (BPP) Performed

- Yes
- No

---

Which Hospital Day BPP Was Performed?

\_\_\_\_\_  
(1 or 2 or 3 or 4...)

---

BPP positive

- Yes Confirmed  
 Yes Probable  
 No

---

BPP Pathogens

- Adenovirus  
 Coronavirus  
 Metapneumovirus  
 Rhinovirus/Enterovirus  
 Influenza A  
 Influenza B  
 Parainfluenza  
 Respiratory Syncytial Virus  
 Acinetobacter  
 Enterobacter  
 Escherichia coli  
 Haemophilus influenzae  
 Klebsiella  
 Moraxella  
 Proteus  
 Pseudomonas  
 Serratia marcescens  
 Staphylococcus aureus  
 Streptococcus  
 Chlamydia  
 Mycoplasma  
 Legionella  
 None

---

Other Infectious Respiratory Diagnosis

- Yes Confirmed  
 Yes Probable  
 No

---

Other Infectious Respiratory diagnosis, specify

\_\_\_\_\_

---

Any of These Positive? (check all that apply)

- HIV  
 Hepatitis B  
 Hepatitis C  
 None  
 Others  
(if HIV status is protected in your state - don't check it)

---

Others\_write

\_\_\_\_\_

---

Viral load undetectable

- Yes  
 No

---

Are Any of These Tests Performed ? (check all that apply)

- CMV PCR
- Cryptococcal Antigen
- Histoplasma Urine Antigen
- Legionella UAg
- Monospot
- PCP PCR
- None

---

Are Any of These Tests Positive ? (check all that apply)

- CMV PCR
- Cryptococcal Antigen
- Histoplasma Urine Antigen
- Legionella UAg
- Monospot
- PCP PCR
- None

---

CMV PCR Value

\_\_\_\_\_

---

Blood Cultures Performed?

- Yes
- No

---

Blood Cultures Positive?

- Yes
- No

---

Which Hospital Day(s) Positive Blood Cultures Performed?

\_\_\_\_\_

---

Positive Blood Culture Organism?

\_\_\_\_\_

---

Sputum Culture Performed?

- Yes
- No

---

Sputum Culture Positive?

- Yes
- No

---

Which Hospital Day(s) Positive Sputum Culture Performed?

\_\_\_\_\_

---

Positive Sputum Culture Organism?

\_\_\_\_\_

---

Urine Culture Performed?

- Yes
- No

---

Urine Culture Positive?

- Yes
- No

---

Which Hospital Day(s) Positive Urine Culture Performed?

\_\_\_\_\_

---

Urine Culture Organism?

\_\_\_\_\_

## Core Data IV (Daily- Imaging, MV)

### Imaging Data

Are any of these performed today (Check all that apply)

- Chest X-ray  
 CT Chest  
 Lung US  
 Cardiac Echo  
 Others

Imaging\_Others

---

Were infiltrates present?

- Yes  
 No

CXR pattern

- Interstitial pattern  
 Opacities  
 Multifocal  
 Bilateral  
 Pleural effusion

CT Chest abnormal

- Yes  
 No

CT chest pattern

- Ground Glass Opacity (GGO)  
 Crazy paving  
 Multifocal  
 Bilateral  
 LAD  
 Pleural effusion  
 Opacity

If CT s/o Pleural Effusion ; Quantity of pleural effusion in CT

- Small  
 Moderate  
 Large

Lung Ultrasound abnormal

- Yes  
 No

Lung Ultrasound Signs

- Bat sign (pleural line)  
 Lung sliding  
 A line horizontal artifact  
 Quoad sign  
 Sinusoid sign  
 Fractal and Tissue like sign  
 B line (vertical artifact )  
 Lung rockets  
 Abolished lung sliding with Stratosphere sign  
 Lung point  
 Lung pulse  
 Dynamic air bronchogram

**Oxygenation and Mechanical Ventilation**

Oxygenation

- High Flow Nasal Cannula
- Invasive Mechanical Ventilation
- Noninvasive Ventilation (CPAP or BIPAP)
- Oxygen Therapy- Bag Mask
- Oxygen Therapy- Non-Rebreathable Mask
- Nasal Canula
- None

Ventilator mode

- Volume control (VC)
- Pressure control (PC)
- Pressure Support (PS)
- APRV
- Others

Vent Mode- Other

---

Tidal volume (ml) - set (not ml/kg), (must for volume control mode)

---

Peak plateau pressure (cm H2O)

---

PEEP (cm H2O)

---

Pressure support (cm H2O) - set (must for Pressure control)

---

Documented ventilator associated pneumonia (VAP)

- No
- Yes

Documented assessment of spontaneous breathing trial?

- No
- Yes
- not indicated

Additional Comments

---

## Core Data V (Daily- Processes of Care, VAP Bundle)

### Daily Processes of Care

Documented Family Conference/Discussion? (check all that apply)

- Phone  
 Video  
 Email  
 Text  
 In-Person  
 None  
 Family Not Available

Was 'limitation to life support interventions' status changed today?

- No  
 Yes  
 N/A

Specify the changed status

- Changed to 'no chest compression'  
 Changed to 'no intubation'  
 Changed to both  
 Changed to full support  
 Changed to palliative / comfort care

### VAP Bundle-- If Patient is Mechanically Ventilated- then fill this section, otherwise skip.

Is patient mechanically ventilated today or have a risk for stress ulcer/VPE?

- Yes  
 No

Is any of these documented? (check all that apply)

- Head of the bed elevation 30 degrees  
 Oral Care - Chlorhexidine/Povidone-Iodine

NeuroMuscular Blockers (NMB) Given?

- None  
 Atracurium  
 Cisatracurium  
 Mivacurium  
 Pancuronium  
 Rocuronium  
 Vecuronium  
 Other

NMB (Bolus/infusion doses) or other NMBs

\_\_\_\_\_

Which of the following are currently being administered for Peptic Ulcer Prophylaxis (PUP)?

- None  
 Not Indicated  
 Pantoprazole  
 Ranitidine  
 Sucralfate  
 Famotidine  
 Omeprazole  
 Lansoprazole  
 Esomeprazole  
 Other

PUP route

- Enteral (via mouth/NG tube)  
 Intravenous (IV)



---

Other PUP

---

PUP Dosing Frequency

- Daily
  - Twice daily
  - Three times daily
  - Four times daily
  - Continuous infusion
- 

PUP Doses-(in mg) (if a continuously infused medication is being given- use a standardized entry value (e.g. mg/hr dose)

---

Which of the following anticoagulation therapies are currently being administered?

- None
  - Not indicated
  - Aargatroban
  - Bivalirudin
  - Dabigatran
  - Fondaparinux
  - Heparin- unfractionated
  - Heparin- low molecular weight
  - Vitamin K antagonist
  - Edoxaban
  - Rivaroxaban
  - Apixaban
  - Betrixaban
  - Others
- 

Other Anticoagulants

---

Anticoagulants Dosing Frequency

- Daily
  - Twice daily
  - Three times daily
  - Four times daily
  - Continuous infusion
- 

### Sedatives, Analgesics, and Paralytics Use

Any use of IV continuous sedation/analgesics/paralytics ? (check all that apply)

- None
  - Dexamedetomidine
  - Fentanyl
  - Ketamine
  - Lorazepam
  - Midazolam
  - Morphine
  - Pentobarbital
  - Propofol
  - Hydromorphone
  - Remifentanil
  - Others
- 

Sedation/analgesics/paralytics\_other

---

---

Sedation/analgesics/paralytics dosing frequency

- Daily
- Twice daily
- Three times daily
- Four times daily
- Continuous infusion

## Core Data VI (Daily-Fluid, Vasopressors, Other Meds)

### Fluid Vasopressors Urine Output

Total Intravenous fluids administered (ml.) not rate  
ml/hour

(Midnight to Midnight 0:00-24:00)

TOTAL Urine Output (ml) in 24 hours? (not in ml/h)

(Midnight to Midnight 0:00-24:00)

Fluid Balance (Total Intake- Total Output)

(Midnight to Midnight 0:00-24:00)

Types of Inotropes/Vasopressors use in 24 hour

- Angiotensin II
- Dobutamine
- Dopamine
- Droxidopa
- Epinephrine
- Isoproterenol
- Milrinone
- Norepinephrine
- Phenylephrine
- Vasopressin
- None
- Other

If Other Inotropes/Vasopress Please specify

\_\_\_\_\_

### Blood Products Use

Any Blood Product Usage during this 24 hours?

- Packed Red Blood Cells
  - Fresh Frozen Plasma
  - Platelets
  - Albumin
  - Cryoprecipitate
  - None
- (0:00 to 24:00)

Indication for RBC transfusion?

- 1. Active Bleeding
- 2. Hb < 7
- 3. Early Septic Shock
- 4. Other

Other\_Indication for RBC transfusion?

\_\_\_\_\_

Indication for FFP transfusion?

- 1. Active Bleeding
- 2. Other

Other\_Indication for FFP transfusion?

\_\_\_\_\_

Indication for Platelet transfusion?

1. Active Bleeding  
 2. Severe Thrombocytopenia (< 10,000)  
 3. Other

Other\_Indication for Platelet transfusion?

\_\_\_\_\_

## Medications

What Medications are Given? (check all that apply)

- Antifungal  
 Antiviral  
 Azithromycin  
 Corticosteroid  
 Diuretics  
 Hydroxychlorquine  
 Statin  
 Anticoagulants  
 Others

Other\_Medications

\_\_\_\_\_

Name of Antivirals used (check all that apply)

- Interferon alpha  
 Interferon beta  
 Lopinavir  
 Neuraminidase inhibitor  
 Remdesivir  
 Ribavirin  
 Ritonavir  
 Other

If other Antiviral , Please specify name

\_\_\_\_\_

Corticosteroid, Route of administration

- Oral  
 Intravenous  
 Inhaled

Please specify the corticosteroid name and dose

\_\_\_\_\_

Antifungal -Name and Dose

\_\_\_\_\_

Miscellaneous Medications

- IL-6 inhibitors - Tocilizumab  
 IL-6 inhibitors - Sarilumab  
 IVIG  
 Anakinra  
 Emapalumab  
 JAK Inhibitors - Baricitinib  
 JAK Inhibitors - Others

Please Write Dose

\_\_\_\_\_

Hydroxychlorquine - Dose

\_\_\_\_\_

---

Azithromycin -Dose

---

Comments\_Daily- Fluids\_Meds

---

## Core Data VII (Outcomes)

### Outcomes Data

Are There Any Lack of Available Resources

- Yes  
 No

Lack of Available Resources (check all that apply)

- Not Enough ICU Bed  
 Not Enough Ventilator  
 Not Enough IV Sets  
 Not Enough ECMO Circuit  
 Doubling-up of Ventilators  
 Out of PPEs for Providers  
 Not Enough Providers  
 Not Enough Sedatives  
 Not Enough Analgesics  
 Not Enough Vasopressors  
 Not Enough Hydroxychloroquine  
 Not Enough Hospital Beds  
 Others

Resource Lack\_Other

---

Any Documented Complication During Hospitalization  
(New onset) (click all that apply)

- Acute Cardiac Injury
- Acute Kidney Injury
- Anemia
- Bacteremia
- Bacterial pneumonia
- Bed Ulcers
- Bronchiolitis
- Cardiac arrest
- Cardiac Arrhythmia New Onset
- Cardiomyopathy
- Co- Or Secondary Infection
- Coagulation disorder / Disseminated Intravascular Coagulation
- Congestive heart failure
- Cryptogenic organizing pneumonia (COP)
- Deep Vein Thrombosis
- Empyema
- Endocarditis
- Gastrointestinal hemorrhage
- Hepatomegaly
- High BNP/NT Pro BNP
- High Troponin I/T/High Sensitivity
- Hyperglycemia
- Hypoglycemia
- Liver dysfunction
- Lung Abscesses
- Meningitis / Encephalitis
- Myocarditis
- Pancreatitis
- Pericarditis
- Pleural Effusions
- Pleurisy
- Pneumothorax
- Renal Failure (AKI)
- Respiratory Failure (ARDS)
- Rhabdomyolysis / Myositis
- Seizure
- Septic Shock
- Splenomegaly
- ST elevations ECG
- Stroke / Cerebrovascular accident
- Viral pneumonitis
- Other (Please Specify)

If Other complication , Please Specify \_\_\_\_\_

IF Yes ARDS , Please Specify severity

- Mild (P:F 200-300)
- Moderate (P:F 100-199)
- Severe (P:F < 100)
- Unknown

Type of Cardiac Arrhythmia

- Atrial fibrillation
- Atrial flutter
- Heart block
- Torsades des point
- ventricular tachycardia
- Ventricular fibrillation
- Paroxysmal supraventricular tachycardia (PSVT)
- Sick sinus syndrome
- Other

If Other arrhythmia , Please specify

\_\_\_\_\_

Total number of days on mechanical ventilation during the entire hospitalization? (for hospital stay > 28 days, please add comments)

\_\_\_\_\_

Comments-For >28 days stay

\_\_\_\_\_

Which Hospital Day Patient Got Discharged from ICU?

\_\_\_\_\_ (1 or 2 or 3 or 4...)

Final ICU diagnosis?

\_\_\_\_\_

ICU discharge status?

- Alive  
 Deceased

Which Hospital Day Patient Got Discharged from Hospital or died?

\_\_\_\_\_ (1 or 2 or 3 or 4...)

Hospital discharge status?

- Alive  
 Deceased

If Died in ICU/Hospital, is any of this was done and documented ? (check all that apply)

- CPR done  
 Family present at the time of death  
 Religious/Spirituals needs fulfilled  
 Comfort care given  
 Palliative care given  
 None

Hospital discharge location

- Home, without assistance  
 Home, with home health  
 Subacute rehabilitation  
 Long-term care facility  
 Hospice  
 Other

Hospital discharge\_other

\_\_\_\_\_

New oxygen requirement at discharge

- Yes  
 No

Is Patient Readmitted with COVID19?

- Yes  
 No

How Many Days Later Since Discharge?

\_\_\_\_\_ (1 or 2 or 3 or 4...)

28 day mortality?

- Alive  
 Deceased  
(Since Hospital Discharge)



---

Was Patient Pregnant?  Yes  
 No

---

Any Pregnancy Related Complication  Gestational Hypertension  
 Pre-Eclampsia  
 Eclampsia  
 Fetal Distress  
 PROM  
 Other ( Please Specify)

---

If Other pregnancy related complication , Please specify \_\_\_\_\_

---

Was Baby Delivered  Yes  
 No

---

Method Of Delivery  Natural unassisted vaginal childbirth  
 Assisted Vaginal childbirth  
 Cesarean surgery (C-section)

---

If C-Section , Indication For C-Section \_\_\_\_\_

---

Treatment Before Delivery  Oxygen Support (Nasal Cannula)  
 Antiviral Therapy  
 Antibiotic Therapy  
 Use Of Corticosteroid  
 IMV  
 NIMV

---

Treatment After Delivery  Oxygen Support (Nasal Cannula)  
 Antiviral Therapy  
 Antibiotic Therapy  
 Use Of Corticosteroid  
 IMV  
 NIMV

---

Neonatal Outcome Applies (was baby born)  Yes  
 No

---

Was the baby infected?  Yes  
 No  
 Unknown/not applicable

---

Birthweight (G) \_\_\_\_\_

---

Premature Delivery  Yes  
 No

---

Apgar Score (1 Min, 5 Min) \_\_\_\_\_

---

Severe Neonatal Asphyxia  Yes  
 No

---

---

Neonatal Death  Yes  
 No

---

Fetal Death Or Stillbirth  Yes  
 No

---

Was baby tested for Mother's Acute Respiratory Infection?  Yes  
 No  
 N/A

---

Baby Test Results are  Positive  
 Negative  
 Unknown or N/A

---

Testing method  PCR  
 Other ( Please Specify)

---

Testing method other, please specify \_\_\_\_\_

---

Appropriate Development for Age?  YES  
 NO  
 Unknown

---

Comments Outcome \_\_\_\_\_

## Enhanced Data 1 (Daily-Vitals, Neuro exam & Labs)

### Vitals on Hospital admission (first available data at admission) and Then daily between (0:00 - 24:00)

Temperature (Highest)

- ≤37.3°C  
 37.3-38.0°C  
 38.1-39.0°C  
 >39.0°C

Heart Rate (Highest)

\_\_\_\_\_

Respiratory Rate (Highest)

\_\_\_\_\_

Systolic Blood Pressure (Lowest)

\_\_\_\_\_

Diastolic Blood Pressure (Lowest)

\_\_\_\_\_

Oxygen saturation (SPO2) in %

\_\_\_\_\_

SPO2 on-

- Room air  
 Oxygen therapy

FiO2 % (0.21 to 1.0) lowest during 24 hours  
If L/min use EPIC-II Conversion Table

\_\_\_\_\_  
 (Midnight  
to  
Midnight  
0:00-24:00

<https://www.intensive.org/epic2/Documents/Estimation%20>

### Admission and Daily Neuro Exam

AVPU Score

- Alert  
 Verbal  
 Pain  
 Unresponsive

Glasgow Coma Score (GCS /15)

\_\_\_\_\_ (if sedated then estimate GCS prior to sedation)

Richmond Agitation Sedation Scale (RASS)

\_\_\_\_\_

Riker Sedation Agitation Scale (SAS)

\_\_\_\_\_

**Arterial Blood Gas Analysis on Admission and Then Daily**

FiO2 (0.21 to 1.0) at the time of blood gas

---

Arterial PaO2 at time of FiO2 above in mmHg

---

PCO2 From same blood gas record as PaO2 in mmHg

---

pH From same blood gas record as PaO2

---

HCO3 From same blood gas record as PaO2 in mEq/L

---

**Labs on Hospital Admission- Then Daily (worst value)**

Leukocyte Count

---

Leukocyte Count Unit

- US ( $\times 10^3/\text{mm}^3$ )  
 International System of Measurement (S.I. units)( $\times 10^9/\text{liter}$ )

Lymphocyte Count

---

Lymphocyte Count Unit

- US( % of white blood cells)  
 International System of Measurement (S.I. units) in Fraction of white blood cells (Normal Range 0.16-0.46 )

Haemoglobin

---

Haemoglobin Unit

- US (g/dl)  
 International System of Measurement (S.I. units) (mmol/liter)

Hematocrit

---

Hematocrit Lab Unit

- US ( % of Red blood cells)  
 International System of Measurement (S.I. units) in Fraction of red blood cells (Normal Range 0.36-0.46 )

Platelets (Thrombocytes)

---

Platelets (Thrombocytes) Lab Unit

- US (  $\times 10^3/\mu\text{L}$ )  
 International System of Measurement (S.I. units) (  $\times 10^9/\text{L}$ )

---

Lactate

---

Lactate Lab Unit

- US (mg/dl)  
 International System of Measurement (S.I. units )  
(mmol/liter)
- 

Lactate Dehydrogenase (LDH) levels

---

Lactate Dehydrogenase (LDH) Level Units

- US (U/L)  
 International System of Measurement (S.I. units )  
( $\mu$ kat/liter)
- 

C-reactive protein (CRP)

---

C-reactive protein (CRP) Lab unit

- US ( mg/L)  
 International System of Measurement (S.I. units)  
(nmol/L)
- 

Procalcitonin

---

Procalcitonin Units

- US ( ng/mL)  
 International System of Measurement (S.I. units)  
(mcg/L)
- 

Ferritin

---

Ferritin Level Unit

- US ( ng/ml)  
 International System of Measurement (S.I. units)  
(mcg/L)
- 

Sodium

---

Sodium Level Units

- US (mEq/L)  
 International System of Measurement (S.I. units)  
(mmol/liter)
- 

Potassium

---

Potassium Lab Unit

- US (mEq/L)  
 International System of Measurement (S.I. units)  
(mmol/liter)
- 

BUN

---

BUN Unit

- US (mg/dl)  
 International System of Measurement (S.I. units)  
(mmol/liter)

---

Serum Creatinine

---

Serum Creatinine Unit

- US (mg/dL)  
 International System of Measurement (S.I. units) (µmol/L)
- 

Aspartate aminotransferase (AST/ SGOT)

---

AST/SGOT Lab Unit

- US (U/L)  
 International System of Measurement (S.I. units) (µkat/liter)
- 

Alanine Aminotransferase (ALT/SGPT)

---

ALT/SGPT Lab Unit

- US (U/L)  
 International System of Measurement (S.I. units) (µkat/liter)
- 

Total bilirubin

---

Total Bilirubin Units

- US (mg/dl)  
 International System of Measurement (S.I. units) (µmol/liter)
- 

Interleukin 6 (IL-6)

---

Interleukin 6 (IL-6) Lab Unit

- US (pg/ml)  
 International System of Measurement (S.I. units) (pg/ml)
- 

Troponin

---

Troponin Level Unit

- US ( ng/mL)  
 International System of Measurement (S.I. units) ( µg/L)
- 

B-Type Natriuretic Peptide (BNP)

---

BNP Level Unit

- US ( pg/mL)  
 International System of Measurement (S.I. units) ( pmol/L)
- 

NT-Pro B-Type Natriuretic Peptide Level

---

NT pro BNP Level Unit

- US ( pg/mL)  
 International System of Measurement (S.I. units) (pmol/L)
-

---

Fibrinogen Level

---

Fibrinogen Level unit

- 
- US ( mg/dl)  
 International System of Measurement (S.I. units) ( g/L)
- 

Alkaline Phosphatase

---

Alkaline Phosphatase Level Unit

- 
- US (U/L)  
 International System of Measurement (S.I. units) (µkat/liter)
- 

D-Dimer

---

D-Dimer Level Unit

- 
- US ( ng/mL )  
 International System of Measurement (S.I. units) (mg/L)
- 

Triglycerides

---

Triglycerides Level Unit

- 
- US ( mg/dL )  
 International System of Measurement (S.I. units) (mmol/L)
- 

Creatine Kinase

---

Creatine Kinase Level Unit

- 
- US (U/L)  
 International System of Measurement (S.I. units) (µkat/liter)
- 

Hemoglobin A1c (HBA1C)

---

Hemoglobin A1c (HBA1C) Level Unit

- 
- US ( % of total Hb)  
 International System of Measurement (S.I. units) (Fraction of total Hb)
- 

CD4 (T-cell) Count (if not checked can use most recent)

---

Prothrombin time in Seconds

---

PT-INR

---

Additional Comments\_Vitals Labs

---

## Enhanced Data 2 (Daily SOFA, Events)

### SOFA score

|                                         |                                                                                                                                                                                                                                                                                                                                                                                                                                 |
|-----------------------------------------|---------------------------------------------------------------------------------------------------------------------------------------------------------------------------------------------------------------------------------------------------------------------------------------------------------------------------------------------------------------------------------------------------------------------------------|
| SOFA_Respiration                        | <input type="radio"/> 0. >400<br><input type="radio"/> 1. < 400 (S:F 221-301), +/- Respiratory support<br><input type="radio"/> 2. < 300 (S:F 142-220), +/- Respiratory support<br><input type="radio"/> 3. < 200 (S:F 67-141) and Respiratory support<br><input type="radio"/> 4. < 100 (S:F < 67) and Respiratory support<br>(Pao <sub>2</sub> / Fio <sub>2</sub> mm Hg (if P:F NA use Sao <sub>2</sub> /Fio <sub>2</sub> ))) |
| SOFA_coagulation (platelet)             | <input type="radio"/> 0. >150<br><input type="radio"/> 1. < 150<br><input type="radio"/> 2. < 100<br><input type="radio"/> 3. < 50<br><input type="radio"/> 4. < 20<br>(X 1000 per mm <sup>3</sup> )                                                                                                                                                                                                                            |
| SOFA_cardiovascular (vasopressors)      | <input type="radio"/> 0. No Hypotension<br><input type="radio"/> 1. MAP < 70 mm Hg<br><input type="radio"/> 2. Dopamin < or = 5 or Dobutamine<br><input type="radio"/> 3. Dopamin > 5 or Epi / Norepi < or =0.1<br><input type="radio"/> 4. Dopamin > 15 or Epi / Norepi > 0.1<br>(mcg/kg/min)                                                                                                                                  |
| SOFA_GCS                                | <input type="radio"/> 0. 15<br><input type="radio"/> 1. 13-14<br><input type="radio"/> 2. 10-12<br><input type="radio"/> 3. 6-9<br><input type="radio"/> 4. < 6                                                                                                                                                                                                                                                                 |
| SOFA_Liver (bilirubin)                  | <input type="radio"/> 0. < 1.2<br><input type="radio"/> 1. 1.2 -1.9 mg/dl ..... 20-32 micromol/L<br><input type="radio"/> 2. 2.0 - 5.9 mg/dl ..... 33-101micromol/L<br><input type="radio"/> 3. 6.0-11.9 mg/dl ..... 102-204micromol/L<br><input type="radio"/> 4. >12 mg/dl ..... >204 micromol/L<br>(mg/dL ..... micromol/L)                                                                                                  |
| SOFA_Renal (creatinine or urine output) | <input type="radio"/> 0. < 1.2 mg/dl (110μmol/L)<br><input type="radio"/> 1. 1.2 -1.9 mg/dl (110-170μmol/L)<br><input type="radio"/> 2. 2.0 - 3.4 mg/dl (171-299μmol/L)<br><input type="radio"/> 3. 2.5-4.9 mg/dl (300-440μmol/L) or urine output<br>< 500 mL/day<br><input type="radio"/> 4. > 5.0 mg/dl (>440μmol/L) or urine output < 200<br>mL/day<br>(mg/dL ..... micromol/L )                                             |



**Daily Treatment/Events**

Treatment/Events

- Prone Ventilation
- Inhaled Nitric Oxide/Epoprostenol
- Extubation
- Reintubation
- Extracorporeal support (ECMO or ELS)
- None

Extubated to:

- BiPAP / CPAP
- High Flow Nasal Cannula
- Nasal Cannula / Nasal Pendant
- Other

Extubated\_Other:

\_\_\_\_\_

**Other Procedure Details**

Other procedures

- None
- Bronchoscopy
- Tracheostomy
- Surgical feeding tube (Not nasogastric tube)
- Unplanned surgery
- Other

If other procedure, please explain

\_\_\_\_\_

Comments\_SOFA Events Procedures

\_\_\_\_\_

## Full Data A (APACHE II)

### APACHE II

**Knaus WA Draper EA et al. APACHE II: A severity of disease classification system. Critical Care Medicine. 1985; 13 (Appendix pages 828-829)**

Calculated APACHE II (First 24 hours) score ?  
<https://www.mdcalc.com/apache-ii-score>

- No  
 Yes  
(If yes, fill the calculated score)

APACHE II (First 24 hours) score

---

APACHE II\_age

1. < or = 44  
 2. 45 - 54  
 3. 55 - 64  
 4. 65 - 74  
 5. = or > 74  
(Years)

APACHE II\_Hematorcit

1. < 20%  
 2. 20 - 29.9%  
 3. 30 - 45.9%  
 4. 46 - 49.9%  
 5. 50- 59.9%  
 6. >60%

APACHE II\_WBC

1. < 1000  
 2. 1000 - 2999  
 3. 3000 - 14999  
 4. 15000 - 19999  
 5. 20000 - 39999  
 6. = or > 40000  
(per micro liter)

APACHE II\_Rectal Temp.

1. > or = 41  
 2. 39 - 40.9  
 3. 38.5 - 38.9  
 4. 36 - 38.4  
 5. 34 - 35.9  
 6. 32 - 33.9  
 7. 30 - 31.9  
 8. < or = 29.9  
(degree C)

APACHE II\_Heart Rate

1. < or = 39  
 2. 40 - 54  
 3. 55 - 69  
 4. 70 - 109  
 5. 110 - 139  
 6. 140 - 179  
 7. = or > 180  
(beats per minute)

APACHE II \_Mean Arterial Pressure

1. < or = 49  
 2. 50 - 69  
 3. 70 - 109  
 4. 110 - 129  
 5. 130 - 159  
 6. = or > 160  
 (MAP= [(2 x diastolic)+systolic] / 3)

APACHE II \_Respiratory Rate

1. < or = 5  
 2. 6 - 9  
 3. 10 - 11  
 4. 12 - 24  
 5. 25 - 34  
 6. 35 - 49  
 7. > or = 50  
 (breaths per mintue)

APACHE II \_Serum Sodium

1. > or = 180  
 2. 160 - 179  
 3. 155- 159  
 4. 150 - 154  
 5. 130 - 149  
 6. 120 - 129  
 7. 111 - 119  
 8. < or = 110  
 (mEq per liter)

APACHE II \_FiO2

$\frac{\text{FiO2 (fraction of inspired oxygen)}}{\text{FiO2 on room air = 0.21}}$

APACHE II \_Pao2

$\frac{\text{(mm Hg, PaO2 (partial pressure of arterial O2) from ABG)}}{\text{}}$

APACHE II \_PaCo2

$\frac{\text{(mm Hg, PaCO2 (partial pressure of arterial CO2) from ABG)}}{\text{}}$

APACHE II \_Arterial pH

$\frac{\text{}}{\text{(xx.xx)}}$

APACHE II \_HCo3

$\frac{\text{}}{\text{(xx.x)}}$

---

APACHE II \_Serum Creatinine

- 1. > or = 3.5 mg/dL (310 micromol/L) and NOT acute renal failure
- 2. 2.0 - 3.4 mg/dL (177-309 micromol/L) and NOT acute renal failure
- 3. 1.5 - 1.9 mg/dL(133-176 micromol/L) and NOT acute renal failure
- 4. 0.6 - 1.4 mg/dL (53-132 micromol/L) and NOT acute renal failure
- 5. < 0.6 mg/dL (53 micromol/L) and NOT acute renal failure
- 6. > or = 3.5 mg/dL (310 micromol/L) and Acute renal failure
- 7. 2.0 - 3.4 mg/dL (177-309 micromol/L) and Acute renal failure
- 8. 1.5 - 1.9 mg/dL (133-176 micromol/L)and Acute renal failure
- 9. 0.6 - 1.4 mg/dL (53-132 micromol/L) and Acute renal failure
- 10. < 0.6 mg/dL (53 micromol/L) and Acute renal failure

---

APACHE II \_History of severe organ insufficiency (heart, liver, kidney, other) or immunocompromised?

- 1. No
- 2. Yes and None-operative patient
- 3. Yes and Emergency post-operative patient
- 4. Yes and Elective surgery post-operative patient

---

APACHE II \_GCS\_Eye opening

- 1. Spontaneous
- 2. To command
- 3. To pain
- 4. No response  
(Glasgow Coma Scoring - Eye)

---

APACHE II \_GCS\_Verbal

- 1. Oriented
- 2. Confused
- 3. Inappropriate
- 4. Incomprehensible
- 5. No Response  
(Glasgow Coma Scoring - Verbal)

---

APACHE II \_GCS\_Motor

- 1. Obeys Ccommands
- 2. Localizes pain
- 3. Withdraws to pain
- 4. Flexion to pain
- 5. Extension to pain
- 6. No Response  
(Glasgow Coma Scoring - Motor)

## Full Data B (Cardiac USG, ECG)

### Echocardiographic measurement

Was echocardiography performed?

- Yes  
 No

Echo Image Available

- Yes  
 No

De-identified Echo Image upload

Left ventricle ejection fraction

\_\_\_\_\_

LVOT Velocity time integral

\_\_\_\_\_

LVOT diameter

\_\_\_\_\_

Mitral lateral annulus E'

\_\_\_\_\_

Mitral septal annulus E'

\_\_\_\_\_

Mitral Valve A velocity

\_\_\_\_\_

Grade of mitral valve regurgitation

\_\_\_\_\_

Mitral valve E velocity

\_\_\_\_\_

Grade of aortic valve regurgitation

\_\_\_\_\_

Right ventricle size

\_\_\_\_\_

Right ventricle systolic function

\_\_\_\_\_

Tricuspid annular plane systolic excursion (TAPSE)

\_\_\_\_\_

Right ventricle Systolic velocity

\_\_\_\_\_

Est PA pressure

\_\_\_\_\_

---

Right ventricle systolic pressure

---

---

Inferior vena cava size

---

---

Inferior vena cava variability

---
